# Supplementary material
Source: PubMed Central journal article supplement (PMC4147989)
Supplement: ASN.2013111150_ASN2013111150SupplementaryData.pdf [file ASN.2013111150_ASN2013111150SupplementaryData.pdf]

**Supplemental Data**

**1. Induction of RDH9 expression in  $POD^{RDH9}$  mice.**

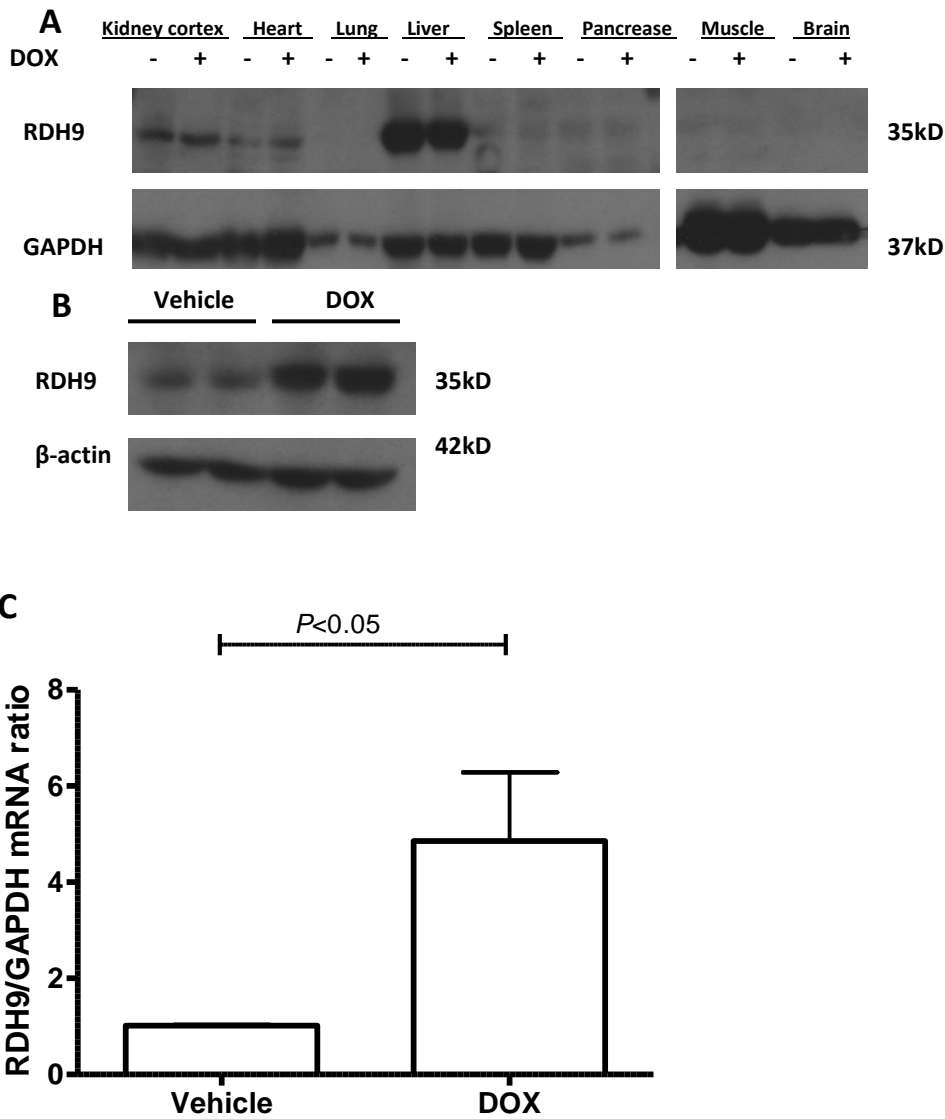

**Figure 1.** Induction of RDH9 expression in  $POD^{RDH9}$  mice: **A.** Western blots of RDH9 expression in kidney cortex and other organs after 4 weeks of DOX or vehicle feeding. **B.** Western blots of RDH9 expression in isolated glomeruli after 4 weeks of doxycycline feeding. The representative blots are shown. **C.** Quantitative real-time PCR for RDH9 mRNA expression in isolated glomeruli was performed (\*  $P < 0.05$  compared with vehicle group,  $n=3$ ).

## 2. Doxycycline had no effect on the expression of podocyte differentiation markers in $POD^{RDH9}$ mice.

**A**

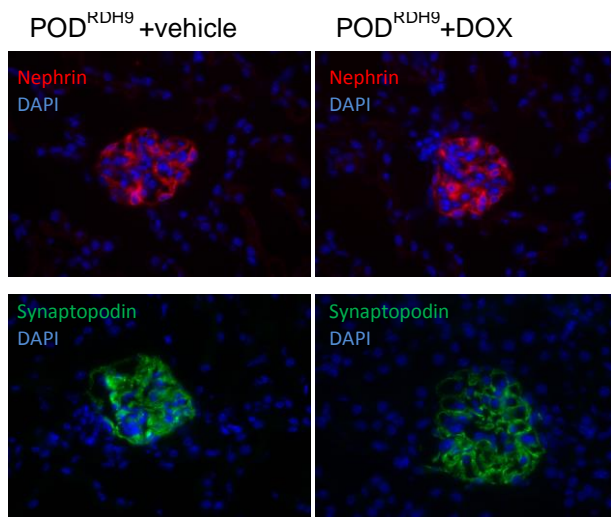

**B**

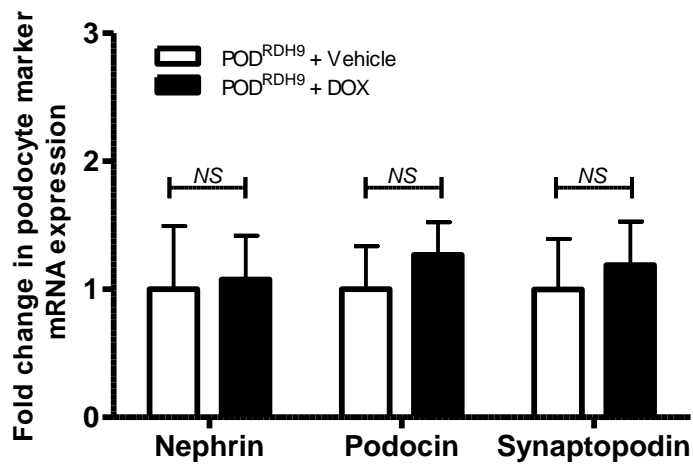

**Figure 2. Expression of Podocyte differentiation markers:** **A:** Immunofluorescence staining for nephrin (red) and synaptopodin (green). Nuclei are labeled by 4'6-diamidino-2-phenylindole (DAPI) (blue). **B:** Quantitative real-time PCR was performed to assess mRNA levels for nephrin, podocin and synaptopodin (n=4).
